# Supplementary material for: Sequestration of the Aβ Peptide Prevents Toxicity and Promotes Degradation In Vivo
Source: PLoS Biol. 2010 Mar 16;8(3):e1000334. doi: 10.1371/journal.pbio.1000334 (PMC2838747; doi:10.1371/journal.pbio.1000334)
Supplement: Table S1 — Transgenic fly survival (median life span). (0.05 MB PDF) [file pbio.1000334.s008.pdf]

**Table S1. Transgenic fly survival (median life span).**

| <b>Fly line</b>                                                                           | <b>Median lifespan in days (<math>\pm</math> standard error)</b> |
|-------------------------------------------------------------------------------------------|------------------------------------------------------------------|
| w1118 (wild type)                                                                         | 38 ( $\pm 1.8$ )                                                 |
| Z domain                                                                                  | 40 ( $\pm 1.3$ )                                                 |
| Z <sub>A<math>\beta</math>3</sub> Affibody                                                | 42 ( $\pm 1.4$ )                                                 |
| (Z <sub>A<math>\beta</math>3</sub> ) <sub>2</sub> Affibody                                | 42 ( $\pm 2.1$ )                                                 |
| A $\beta$ <sub>40</sub>                                                                   | 38 ( $\pm 2.1$ )                                                 |
| Z domain + A $\beta$ <sub>40</sub>                                                        | 42 ( $\pm 3.0$ )                                                 |
| Z <sub>A<math>\beta</math>3</sub> Affibody + A $\beta$ <sub>40</sub>                      | 41 ( $\pm 2.0$ )                                                 |
| (Z <sub>A<math>\beta</math>3</sub> ) <sub>2</sub> Affibody + A $\beta$ <sub>40</sub>      | 38 ( $\pm 2.4$ )                                                 |
| A $\beta$ <sub>42</sub>                                                                   | 28 ( $\pm 0.4$ )                                                 |
| Z domain + A $\beta$ <sub>42</sub>                                                        | 27 ( $\pm 0.5$ )                                                 |
| Z <sub>A<math>\beta</math>3</sub> Affibody + A $\beta$ <sub>42</sub>                      | 32 ( $\pm 0.7$ )                                                 |
| (Z <sub>A<math>\beta</math>3</sub> ) <sub>2</sub> Affibody + A $\beta$ <sub>42</sub>      | 40 ( $\pm 1.2$ )                                                 |
| A $\beta$ <sub>42</sub> E22G                                                              | 9 ( $\pm 0.5$ )                                                  |
| Z domain + A $\beta$ <sub>42</sub> E22G                                                   | 12 ( $\pm 0.4$ )                                                 |
| Z <sub>A<math>\beta</math>3</sub> Affibody + A $\beta$ <sub>42</sub> E22G                 | 20 ( $\pm 0.2$ )                                                 |
| (Z <sub>A<math>\beta</math>3</sub> ) <sub>2</sub> Affibody + A $\beta$ <sub>42</sub> E22G | 31 ( $\pm 0.8$ )                                                 |
